# Supplementary material
Source: MDPI journal article supplement (https://www.mdpi.com/2071-1050/14/12/7332)
Supplement: s1 [file s1]

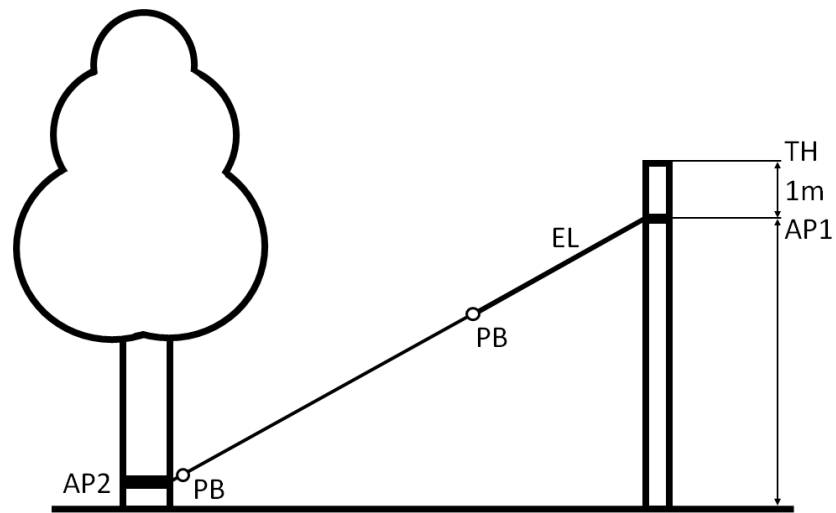

**Figure S1.** A scheme of the setup of static tree pulling. AP1, AP2–upper and base anchor points of pulling line, respectively; PB–pulley block; EL–extension line; 0.5H–half tree height; TH–topping height.

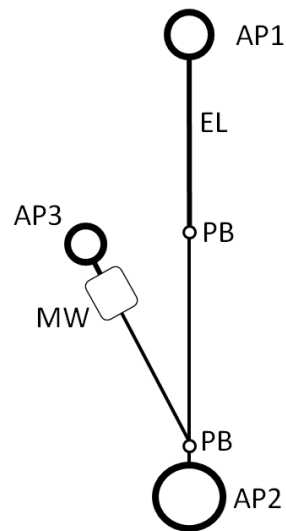

**Figure S2.** The location of motor winch during the static tree pulling. AP1, AP2 and AP3–anchoring points; MW–motor-winch; PB–pulley block; EL– extension line.

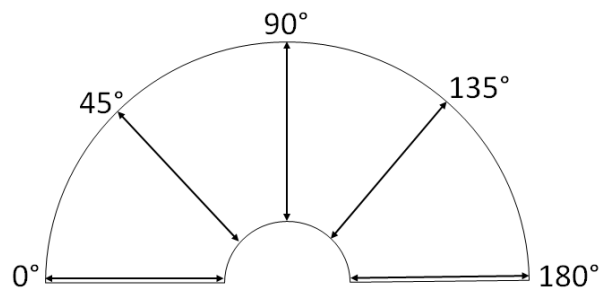

**Figure S3.** Measurements of the radii of the surface of soil-root plate in 5 directions at 0°, 45°, 90°, 135°, and 180°.
